# Supplementary material
Source: PubMed Central journal article supplement (PMC3503204)
Supplement: 1213931109_pnas.201213931SI.pdf [file 1213931109_pnas.201213931SI.pdf]

# Supporting Information

Maksaev and Haswell 10.1073/pnas.1213931109

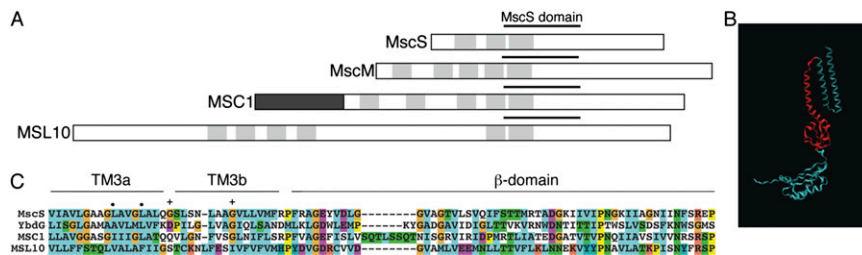

**Fig. S1.** Topology and conserved domains of select MscS homologs from bacteria, algae, and plants. (A) Topology of MscS (1) and predicted topology of MscS, MSC1, and MSL10. Dark gray box, chloroplast transit peptide; light gray boxes, transmembrane helices. (B) Ribbon diagram of a single subunit of MscS from the revised crystal structure (PDB ID code 20AU; refs. 2 and 3). The conserved MscS domain is indicated in red. (C) Alignment of “MscS domain” sequences from MscS and MscM (*Escherichia coli*), MSC1 (*Chlamydomonas reinhardtii*), and MSL10 (*Arabidopsis thaliana*). Asterisks indicate conserved residues, + signs indicate residues in MscS that produce slow closure when mutated to alanine (4), and dots indicate the two hydrophobic seal residues. Sequences corresponding to TM3a, TM3b, and the  $\beta$ -domain of MscS are as in ref. 2.

1. Miller S, et al. (2003) Domain organization of the MscS mechanosensitive channel of *Escherichia coli*. *EMBO J* 22(1):36–46.
2. Bass RB, Strop P, Barclay M, Rees DC (2002) Crystal structure of *Escherichia coli* MscS, a voltage-modulated and mechanosensitive channel. *Science* 298(5598):1582–1587.
3. Steinbacher S, Bass RB, Strop P, Rees DC (2007) Structures of the Prokaryotic Mechanosensitive Channels Mscl and MscS. *Mechanosensitive Ion Channels, Part A*, ed Hamill OP (Elsevier Academic Press, San Diego, CA), Vol 58.
4. Akitake B, Anishkin A, Liu N, Sukharev S (2007) Straightening and sequential buckling of the pore-lining helices define the gating cycle of MscS. *Nat Struct Mol Biol* 14(12):1141–1149.

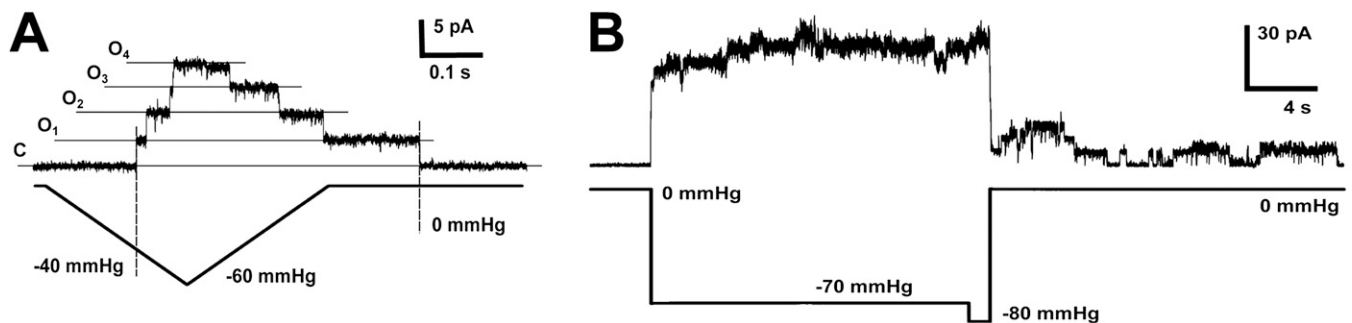

**Fig. S2.** MSL10 hysteresis and residual activity in high MgCl<sub>2</sub>. (A) An example of slow closure of MSL10. Membrane potential  $-40$  mV, bubble number (BN) 5. (B) Residual activity of MSL10 at zero applied tension. Membrane potential  $-60$  mV, BN 4.5. Both A and B were performed in symmetric 60 mM MgCl<sub>2</sub> buffer.

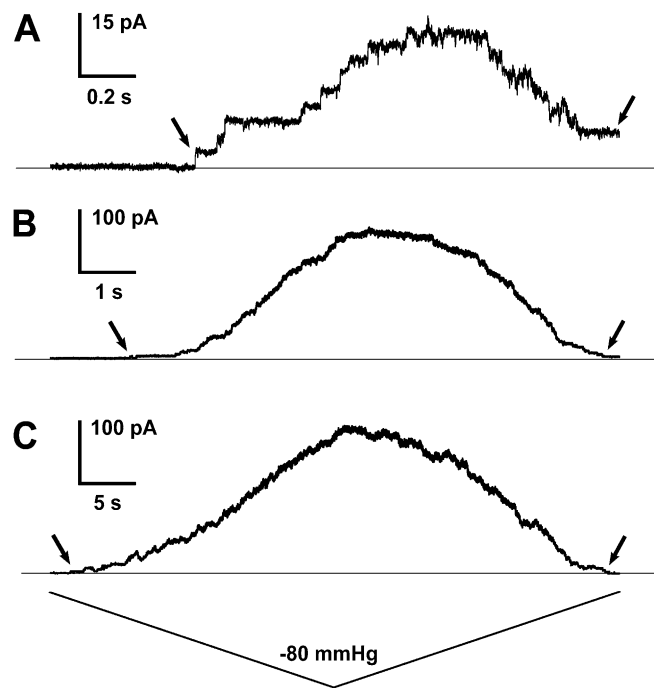

**Fig. 53.** Effect of ramp speed on the threshold pressure for MSL10 opening and closing. Traces were obtained from the same patch subject to pressure ramps of various length: 1 s (*A*), 5 s (*B*), and 25 s (*C*). Arrows indicate opening and closing pressure thresholds. Membrane potential  $-30$  mV, pipette BN 5, symmetric ND96 buffer.

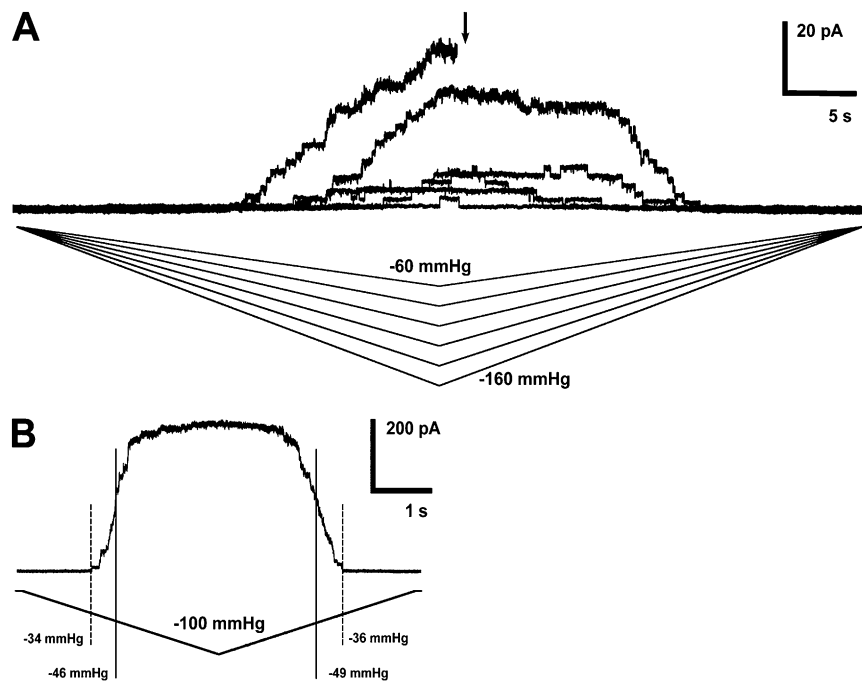

**Fig. 54.** (*A*) MSL10 dose-response traces from an excised inside-out patch. Arrow indicates the point where the patch collapsed. (*B*) Illustration of the easily achievable current saturation and lack of hysteresis in MscS expressed in *Xenopus* oocytes. Dotted lines indicate opening and closing pressure thresholds and dashed lines indicate midpoints of the activation curve. Both traces were recorded from excised inside-out patches from the same batch of oocytes, in symmetric ND96 buffer, pipette BN 4.5, at a membrane potential of  $-20$  mV.
